# Supplementary material for: Unzipping Zipf’s law
Source: PubMed Central journal article supplement (PMC5549924; doi:10.1371/journal.pone.0181987), 2017-08-09
Supplement: pone.0181987.s004.pdf [file pone.0181987.s004.pdf]

## Derivation of the slope

The explanation for the slope puzzle is largely in the relative sizes of classes. The average frequency of the smallest closed class  $mean(freq_C)$  can be calculated by dividing the total class frequency  $total_C$  by the class size  $size_C$  (as for any other class). If there is to be a straight line with slope  $-1$  through double-log space,

- (1) a.  $\log(freq(rank_i)) = \log(max(freq)) - \log(rank_i)$ ,
- b.  $\log(max(freq)) = \log(max(rank))$ , and therefore
- c.  $\log(freq(rank_i)) = \log(max(rank)) - \log(rank_i)$ .

For class  $C$ , the smallest closed class including the most frequently used item, it should also hold that

$$(2) \quad \log(mean(freq_C)) = \log(max(rank)) - .5 * \log(size_C).$$

That is, given a slope of  $-1$  (in an equidistribution), the mean of a class should correspond to its median value.

Given our initial observation about  $mean(freq_C)$ , we have

$$(3) \quad \log(total_C / size_C) = \log(max(rank)) - .5 * \log(size_C),$$

which can be rewritten as

- (4) a.  $\log(total_C) - \log(size_C) = \log(max(rank)) - .5 * \log(size_C)$
- b.  $.5 * \log(size_C) = \log(total_C) - \log(max(rank))$ .

$total_C$  is proportional to the corpus size and follows from the grammar:

- (5) a.  $total_C = proportion_C * corpusSize$
- b.  $\log(total_C) = \log(corpusSize) + \log(proportion_C)$ .

Combining (4-b) and (5-b), we get

$$(6) \quad .5 * \log(size_C) = \log(corpusSize) + \log(proportion_C) - \log(max(rank)),$$

or equivalently

$$(7) \quad .5 * \log(size_C) - \log(proportion_C) = \log(corpusSize) - \log(max(rank)).$$

Undoing the logarithms, this means that

$$(8) \quad \frac{\sqrt{size_C}}{proportion_C} = \frac{corpusSize}{max(rank)}$$

Since  $S$  is a closed class,  $size_C$  does not increase with corpus size (once all members are attested, that is, which should hold for relatively small corpora already). Also  $proportion_C$  is a given, as it follows from the grammar. For example, if articles are obligatory, you have to use an article for each noun. Hence the left hand side of the equation can be considered a constant. Since the maximum rank, i.e. the number of types, can only increase through the open classes, the combined open class sizes  $size_O$  should grow proportionally with corpus size. Finally, if we consider the fact that  $max(rank)$  is the sum of  $size_C$  and  $size_O$ , we get:

- (9) a.  $\frac{\sqrt{size_C}}{proportion_C} = \frac{corpusSize}{size_O + size_C}$
- b.  $size_O = \frac{corpusSize}{\sqrt{size_C / proportion_C}} - size_C$

For Melville's *Moby Dick*, which was shown in the main text to come close to the Zipfian ideal, (9-b) predicts an open class size of approximately 11,269 types (sum

proportion of three articles is .09 and the total length is 216,926 words):

$$(10) \quad size_O = \frac{216,926}{\sqrt{3}/.09} - 3 = 11,269$$

This estimation is in the right ballpark given the attested number of types of 17,507. More generally, assuming a class size of four and class frequency of .1 for class  $C$  as a rule of thumb, (9) predicts that the joint size of the open classes should be the corpus size divided by 20, which seems reasonable.

In sum, for a slope of  $-1$  in double-log space and Zipf's law to be applicable, the combined size of the open classes should exceed that of the closed classes by several orders of magnitude.
