# Supplementary material for: Unzipping Zipf’s law
Source: PubMed Central journal article supplement (PMC5549924; doi:10.1371/journal.pone.0181987), 2017-08-09
Supplement: pone.0181987.s006.pdf [file pone.0181987.s006.pdf]

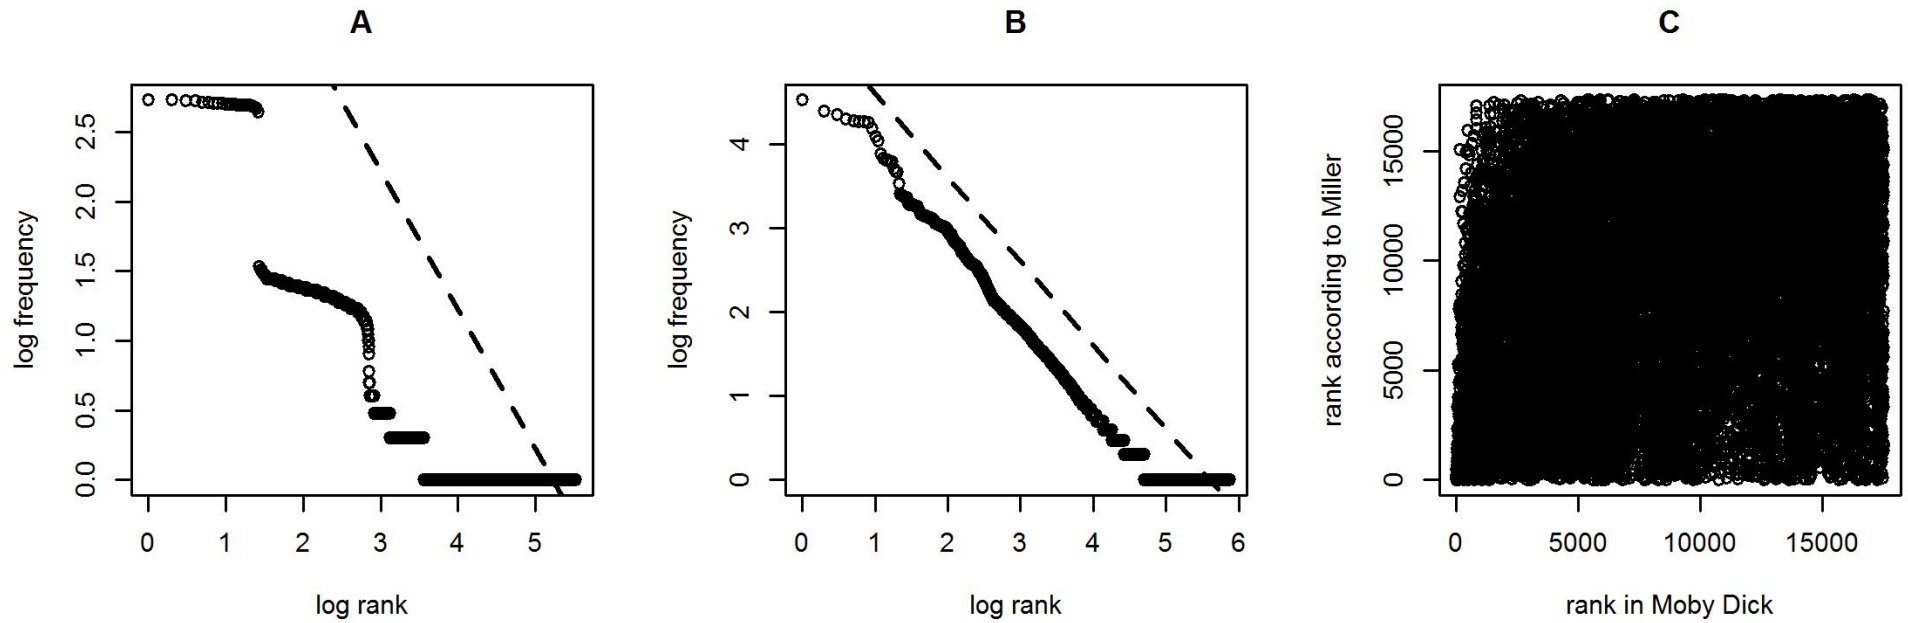

**Simulation of Miller's proposal.** A: predicted frequency by rank in double-log space with uniform character probability. B: using differential character probability (as determined by *Moby Dick*). Dashed lines show ideal Zipfian distribution. C: rank of words in *Moby Dick* against their rank as predicted by Miller.
