# Supplementary material for: Unzipping Zipf’s law
Source: PubMed Central journal article supplement (PMC5549924; doi:10.1371/journal.pone.0181987), 2017-08-09
Supplement: pone.0181987.s007.pdf [file pone.0181987.s007.pdf]

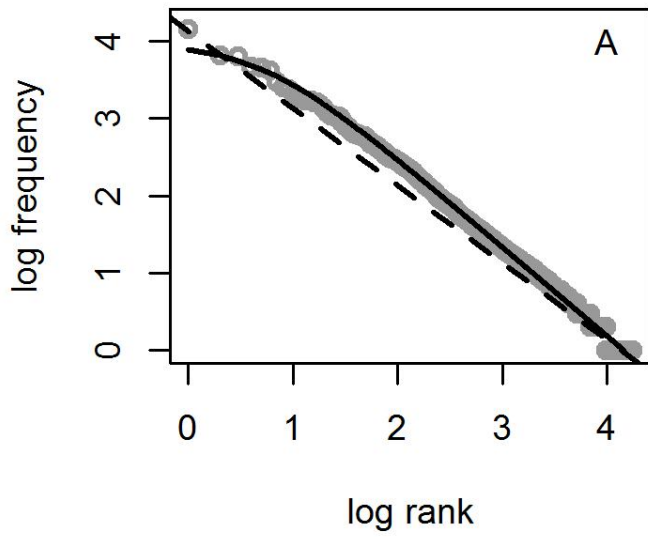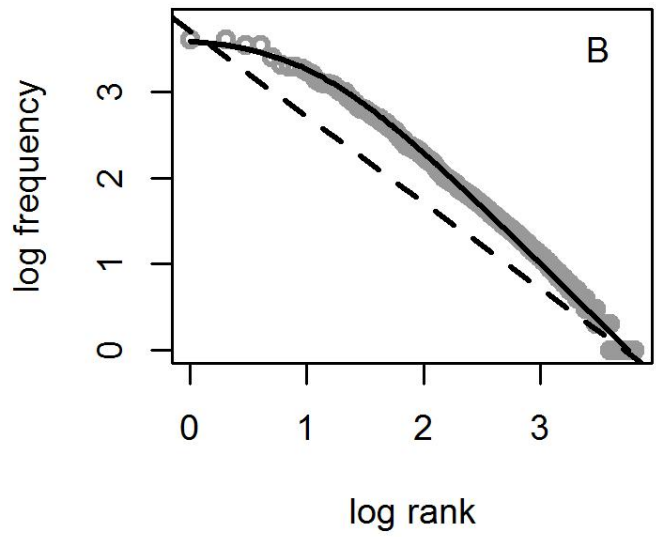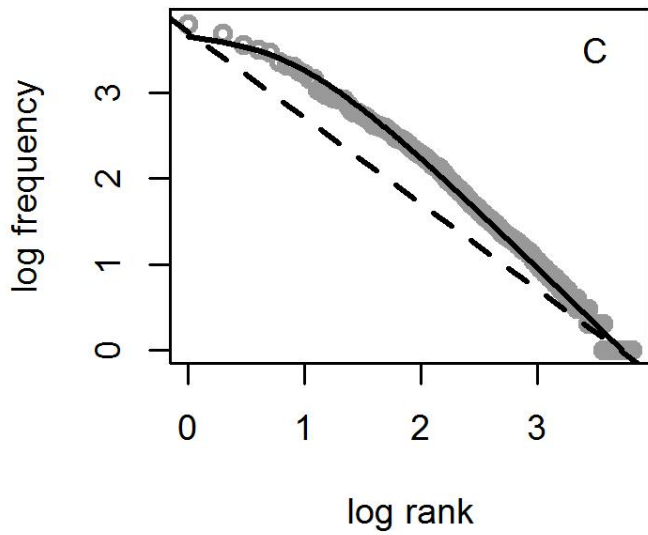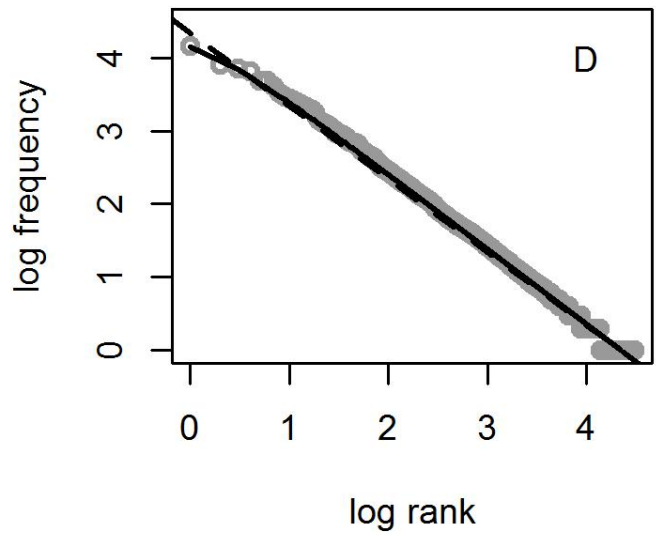

**Mandelbrot's law.** Model parameters are given in Table 1 of S2 Text. A: Herman Melville's *Moby Dick*. B: Jane Austen's *Sense and Sensibility*. C: Mark Twain's *Adventures of Huckleberry Finn*. D: James Joyce's *Ulysses*.
