# Supplementary material for: Unzipping Zipf’s law
Source: PubMed Central journal article supplement (PMC5549924; doi:10.1371/journal.pone.0181987), 2017-08-09
Supplement: pone.0181987.s009.pdf [file pone.0181987.s009.pdf]

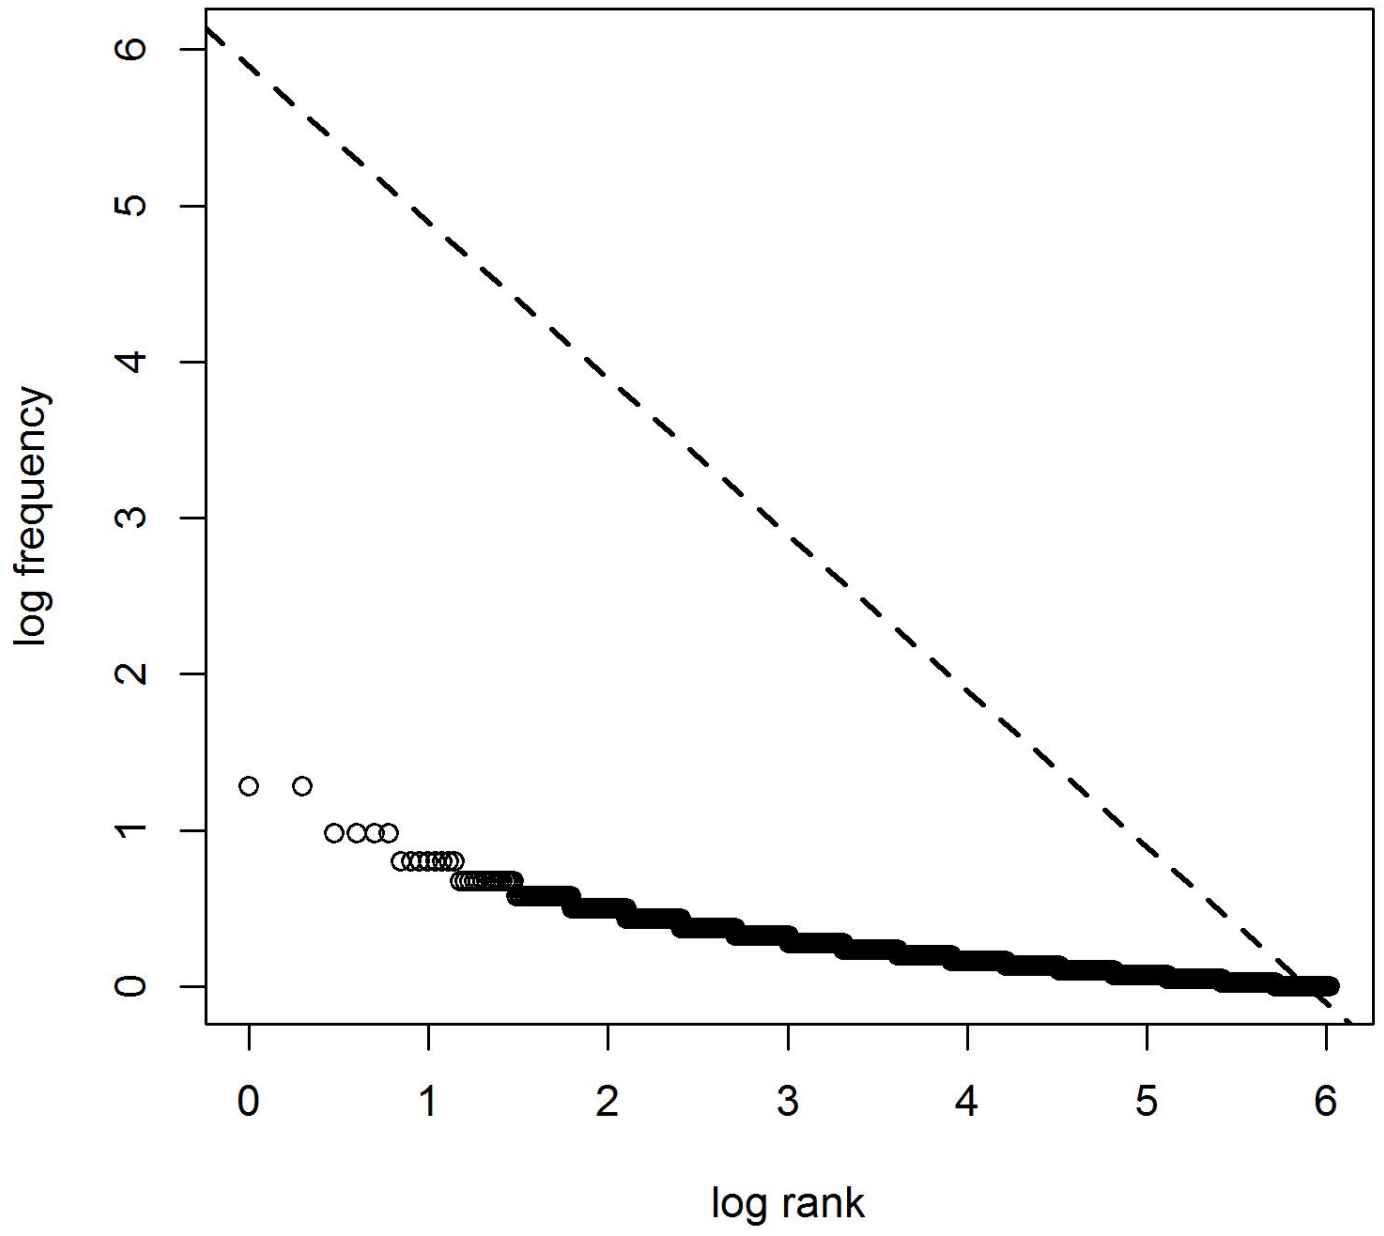

Results for replication of Manin
